# Supplementary material
Source: publisher figshare collection journal article supplement (https://sage.figshare.com/ndownloader/files/21943860)
Supplement: Supplementary file 1 [file 21943860]

**Supplementary Table 2** Adherence to the recommended laboratory monitoring tests in the months before and after initiation of the first oral disease-modifying therapy for the treatment of multiple sclerosis.

| Number (n) of people included, by oral DMT and time period | Proportion of people with a laboratory test |      |                  |      |            |      |
|------------------------------------------------------------|---------------------------------------------|------|------------------|------|------------|------|
|                                                            | Biochemical liver test <sup>a</sup>         |      | Lymphocyte count |      | Urinalysis |      |
|                                                            | n                                           | %    | n                | %    | n          | %    |
| <b>Dimethyl fumarate</b>                                   |                                             |      |                  |      |            |      |
| Pre-treatment                                              |                                             |      |                  |      |            |      |
| Within 6 months, n=567                                     | 518                                         | 91.4 | 531              | 93.7 | 438        | 77.2 |
| On-treatment                                               |                                             |      |                  |      |            |      |
| Months 1-6, n=339                                          | 302                                         | 89.1 | 305              | 90.0 | 253        | 74.6 |
| Months 7-12, n=197                                         | 175                                         | 88.8 | 180              | 91.4 | 141        | 71.6 |
| <b>Fingolimod</b>                                          |                                             |      |                  |      |            |      |
| Pre-treatment                                              |                                             |      |                  |      |            |      |
| Within 6 months, n=253                                     | 222                                         | 87.8 | 231              | 91.3 |            | NA   |
| On-treatment                                               |                                             |      |                  |      |            |      |
| Months 1-3, n=225                                          | 138                                         | 61.3 |                  | NA   |            | NA   |
| Months 4-6, n=206                                          | 139                                         | 67.5 |                  |      |            |      |
| Months 7-9, n=192                                          | 118                                         | 61.5 |                  |      |            |      |
| Months 10-12, n=167                                        | 92                                          | 55.1 |                  |      |            |      |

|                        |     |      |     |      |  |    |
|------------------------|-----|------|-----|------|--|----|
| <b>Teriflunomide</b>   |     |      |     |      |  |    |
| Pre-treatment          |     |      |     |      |  |    |
| Within 6 months, n=196 | 179 | 91.3 | 183 | 93.4 |  | NA |
| On-treatment           |     |      |     |      |  |    |
| Month 1, n=174         | 70  | 40.2 |     | NA   |  | NA |
| Month 2, n=156         | 64  | 41.0 |     |      |  |    |
| Month 3, n=147         | 59  | 40.1 |     |      |  |    |
| Month 4, n=131         | 45  | 34.4 |     |      |  |    |
| Month 5, n=124         | 39  | 31.5 |     |      |  |    |
| Month 6, n=117         | 29  | 24.8 |     |      |  |    |

Key: DMT, disease-modifying therapy

<sup>a</sup>Minimum recommendations, for the biochemical liver tests, according to each DMTs product monograph: either ALT or AST for dimethyl fumarate and fingolimod; and for teriflunomide, either ALT or AST pre-treatment, and ALT while on-treatment.

NA – not applicable as the relevant laboratory test was not part of the routine monitoring recommendations.
